# Supplementary material for: Molecular cloning and expression of an encoding galactinol synthase gene (AnGolS1) in seedling of Ammopiptanthus nanus
Source: PubMed Central journal article supplement (PMC5081558; doi:10.1038/srep36113), 2016-10-27
Supplement: srep36113-s1.pdf [file srep36113-s1.pdf]

## Supplementary Information

### **Molecular cloning and expression of an encoding galactinol synthase gene (*AnGolSI*) in seedling of *Ammopiptanthus nanus***

YuDong Liu, Li Zhang, LiJing Chen, Hui Ma, YanYe Ruan, Tao Xu,  
ChuanQiang Xu, Yi He, MingFang Qi

1. Horticulture Department, Shenyang Agricultural University, No. 120 Dongling Road, Shenhe District 110866, PR China

2. Key Laboratory of Protected Horticulture of Ministry of Education, No.120 Dongling Road, Shenhe District 110866, PR China

3. Key Laboratory of Protected Horticulture of Liaoning Province, No. 120 Dongling Road, Shenhe District 110866, PR China

4. Key laboratory of agricultural biotechnology of Liaoning Province, No. 120 Dongling Road, Shenhe District 110866, PR China

5. Collaborative Innovation Center of Protected Vegetable Surround Bohai Gulf Region, No. 120 Dongling Road, Shenhe District 110866, PR China

Horticulture Department, Shenyang Agricultural University, No. 120 Dongling Road, Shenhe District , Shenyang 110866, P R China

Tel No. +86-24-88342256

Fax No. +86-24-88342256

E-mail: qimingfang@126.com

## Supplementary Figures

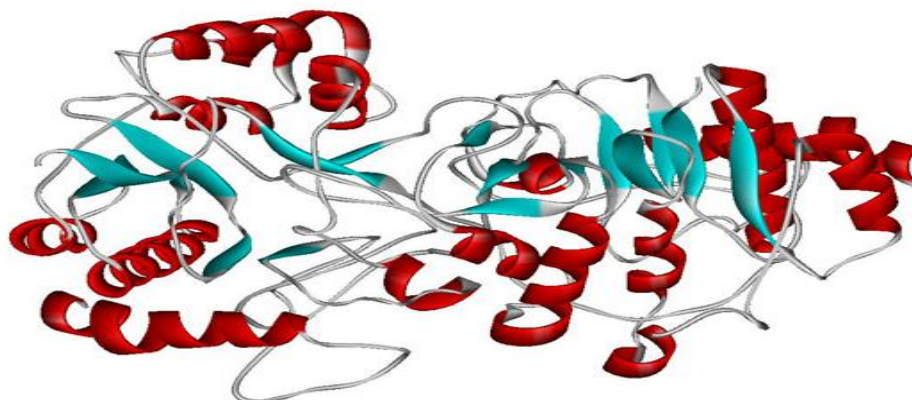

**Figure S1.** The predicted 3D structure of *AnGolS1*. The 3D structure of *AnGolS1* resembled two connected half ball, the left half ball formed with 9 strands and 8 helices, the right half ball formed with 8 strands and 8 helices.

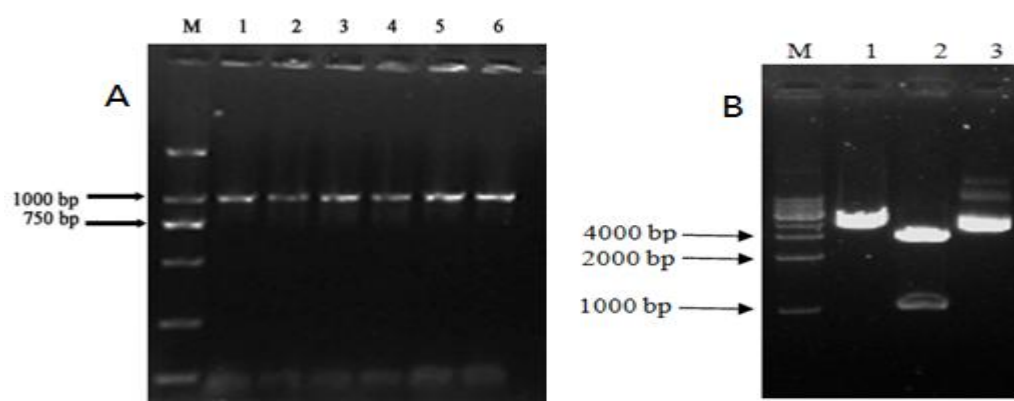

**Figure S2.** (A) The CDS of *AnGolS1* clone. The PCR programs contained 2  $\mu$ L of cDNA, 5 $\mu$ L 10  $\times$  buffer, 1 mM of primer pair, 0.2 mM of dNTPs, 1.5 mM of MgSO<sub>4</sub>, 1U of KOD-Plus-Neo DNA polymerase [Toyobo, Japan], and sterile double distilled water to the final volume of 50  $\mu$ L. M, DL2000 Marker; 1-6 lane, T<sub>m</sub> value 55, 56, 57, 58, 59, 60 and 62  $^{\circ}$ C, respectively. (B) The identification of recombinant plasmid by double restriction endonuclease digestion. The restriction programs contained 1  $\mu$ g of recombinant plasmid, 2  $\mu$ L 10 $\times$ reaction buffer, 10U of BamHI/HindIII restriction enzyme (Thermo), and sterile double distilled water to the final volume of 20  $\mu$ L. M, 1kb DNA Ladder; 1 lane, BamHI single restriction endonuclease digestion; 2 lane, BamHI + HindIII digestion; 3 lane, no digestion.

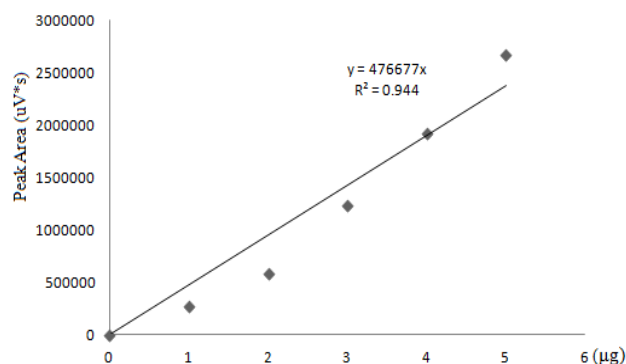

**Figure S3.** The standard curve of Galactinol. X-axis, quantity ( $\mu\text{g}$ ); Y-axis, peak area ( $\text{uV}\cdot\text{s}$ ).

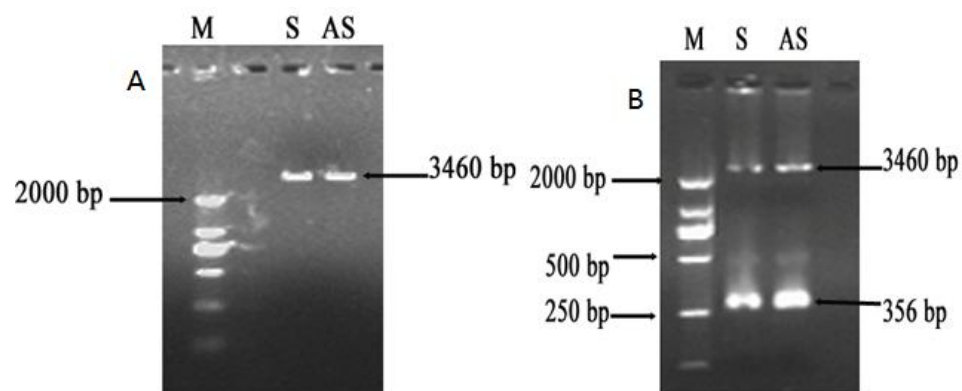

**Figure S4.** (A) The single restriction endonuclease digestion of ISH *pSPT19* recombinant plasmid. M, DL2000 Marker; S, BamH I digestion sense probe recombinant plasmid; AS, Ecor I digestion antisense probe recombinant plasmid. (B) The identification of ISH probes. M, DL2000 Marker; S, Sense probe (T7 RNA polymerase); AS, Antisense probe (SP6 RNA polymerase). The 3460 bp band represent linearized plasmid DNA; the 356 bp band represent synthesized single DIG-labeled RNA probes.

## Supplementary Tables

**Table S1.** The analysis data of standard curve.

| Sample concentration<br>(mg/mL) | Sample Volume<br>( $\mu\text{L}$ ) | Peak Area<br>( $\text{uV}\cdot\text{s}$ ) | Quantity<br>( $\mu\text{g}$ ) |
|---------------------------------|------------------------------------|-------------------------------------------|-------------------------------|
| 0.2                             | 5.0                                | 271501                                    | 1                             |
| 0.4                             | 5.0                                | 587562                                    | 2                             |
| 0.6                             | 5.0                                | 1233202                                   | 3                             |
| 0.8                             | 5.0                                | 1927052                                   | 4                             |
| 1.0                             | 5.0                                | 2672562                                   | 5                             |

**Table S2.** The analysis data of reaction products in enzyme activity assay.

| Total Reaction Volume( $\mu$ L) | Reaction Time (min) | Sample Volume ( $\mu$ L) | Peak Area (uV*s) | Quantity ( $\mu$ g) |
|---------------------------------|---------------------|--------------------------|------------------|---------------------|
| 30                              | 5                   | 5.0                      | 164412           | 2.069477            |
| 30                              | 10                  | 5.0                      | 286537           | 3.606681            |
| 30                              | 20                  | 5.0                      | 369635           | 4.652647            |
| 30                              | 30                  | 5.0                      | 389291           | 4.90006             |
| 30                              | 40                  | 5.0                      | 426947           | 5.374042            |
| 30                              | 50                  | 5.0                      | 411294           | 5.177015            |
| 30                              | 60                  | 5.0                      | 412244           | 5.188973            |

**Table S3.** The sequences of primers during this study.

| Primer name | Sequence(5' -' 3)                      | Description                                         |
|-------------|----------------------------------------|-----------------------------------------------------|
| AAP         | GGCCACGCGTCGACTAGTACGGGIIGGGIIGGGIIG   | 5'RACE the first PCR adapter primer                 |
| AUAP        | GGCCACGCGTCGACTAGTAC                   | 5'RACE the second PCR adapter primer                |
| UAP         | CUACUACUACUAGGCCACGCGTCGACTAGTAC       | 5'RACE the third PCR adapter primer                 |
| AP          | GGCCACGCGTCGACTAGTACTTTTTTTTTTTTTTTTTT | Universal adapter primer, outer                     |
| AP1         | GGCCACGCGTCGACTAGTAC                   | Universal primer, nested                            |
| 3-GS1       | AGCCTAATCTCGTCACTTACCGT                | 3'-RACE forward primer, outer                       |
| 3-GS2       | CAGGGAAAAATACAAGCCAATAC                | 3'-RACE forward primer, inner                       |
| 5-GS        | TTGAAATAGAGAGGAGGCTTGG                 | 5'RACE Reverse Transcript gene primer               |
| 5-GS1       | CCAATCTGATACTGAGGGGTGTG                | 5'RACE the first PCR gene primer                    |
| 5-GS2       | TGAGGGGTGTGGGTCCAACCTT                 | 5'RACE the second PCR gene primer                   |
| 5-GS3       | TCACAGAAACAATCCATAACCGC                | 5'RACE the third PCR gene primer                    |
| AnGS F      | AAGGATCC ATGGCACCTGATATCACCACCG        | Full length cDNA sequence primer, forward (BamHI)   |
| AnGS R      | GGAAGCTTTTAGGCAGCGGATGGGGC             | Full length cDNA sequence primer, reverse (HindIII) |
| AnGS RT-F   | ACGAATTTGGGAGTTTGTGGAG                 | Real-time PCR primer, forward                       |

|              |                                          |                                                         |
|--------------|------------------------------------------|---------------------------------------------------------|
| AnGS<br>RT-R | AATAGAGAGGAGGCTTGGGACC                   | Real-time PCR primer,<br>reverse                        |
| Actin F      | ACATTGTCTTGAGTGGTGGTTC                   | Standard control primer,<br>forward                     |
| Actin R      | TACTTCCTCTCTGGTGGTGCTA                   | Standard control primer,<br>reverse                     |
| AnGS<br>SF   | <u>AAGGATCC</u> GCTAAAGGACTTAGGAAGGTGAA  | Sense probe GST7 PCR<br>primer, forward (EcoRI)         |
| AnGS<br>SR   | GT <u>GAAATC</u> CCAATCTGATACTGAGGGGTGTG | Sense probe GST7 PCR<br>primer, reverse (BamHI)         |
| AnGS<br>ASF  | GT <u>GAAATC</u> GCTAAAGGACTTAGGAAGGTGAA | Antisense probe GSSP6<br>PCR primer, forward<br>(BamHI) |
| AnGS<br>ASR  | <u>AAGGATCC</u> CCAATCTGATACTGAGGGGTGTG  | Antisense probe GSSP6<br>PCR primer, reverse<br>(EcoRI) |

---
